# Supplementary material
Source: PubMed Central journal article supplement (PMC3718183)
Supplement: 1310233110_pnas.201310233SI.pdf [file 1310233110_pnas.201310233SI.pdf]

# Supporting Information

Zhou et al. 10.1073/pnas.1310233110

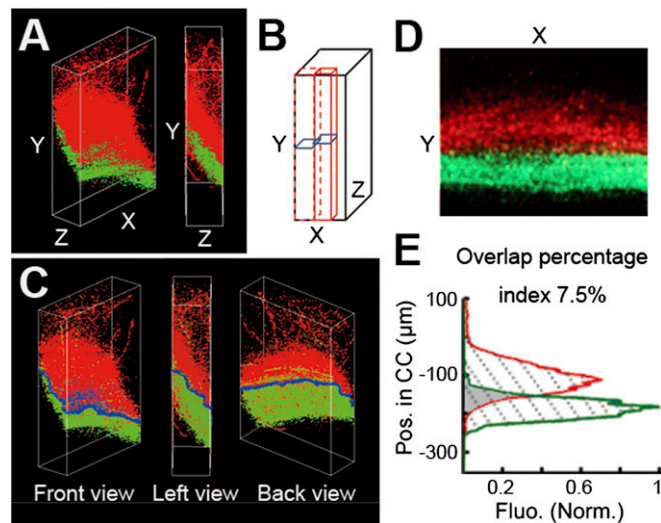

**Fig. S1.** Analysis of axon segregation. (A) Rescaled image in two different views. (B) The corpus callosum (CC) was divided into square columns along the dorsal-ventral (D-V) (y) axis. (C) The segregation surface for red and green axons within each square column is depicted in blue and is shown in three different views. (D) The fluorescence intensities along the anterior-posterior (z) axis were summed after the image within each column was realigned and shifted along the y-axis to flatten the segregation surface into a plane. (E) The fluorescence intensities along the x-axis then were summed to obtain the fluorescence profile along the D-V (y) axis. Fluor.(Norm.), normalized fluorescence; Pos., position.

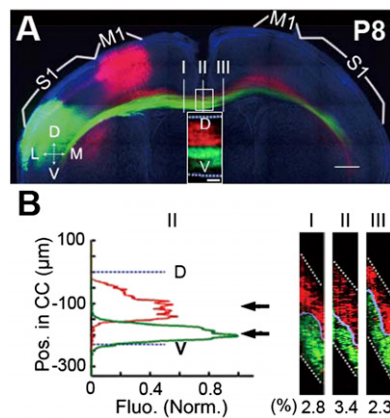

**Fig. S2.** Axons from two distinct M1 and S1 cortical regions showed a lower percentage of overlap near the midline. (A) A 200- $\mu\text{m}$  coronal section from a P8 mouse brain with M1 and S1 neurons labeled with mCherry and EGFP, respectively. Segregation of axons at three different locations (marked I, II, III) were analyzed before and after midline crossing. (Scale bar, 500  $\mu\text{m}$ .) (Inset) Projection of a realigned image of axons for section II in A (scale bar, 50  $\mu\text{m}$ ) for quantitative analysis of axon segregation within the CC (Materials and Methods). Dashed white lines indicate dorsal and ventral surfaces of the CC. (B) (Left) Fluorescence profiles of labeled axons at section II at various positions along the D-V axis of the CC. The profile represents the normalized fluorescence intensity of axons (Materials and Methods). The percentage of overlap between two populations of axons was calculated as described in Materials and Methods. Arrows indicate the position of the mean fluorescence intensity. (Right) A sagittal view of three sections before and after midline crossing in the CC (thickness: 92–139  $\mu\text{m}$ ), with percentages of overlap shown below. D, dorsal; L, lateral; M, medial; V, ventral.









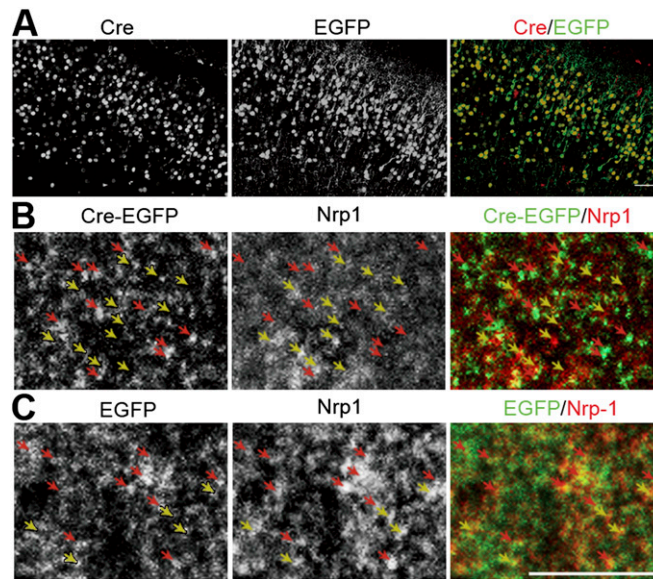

**Fig. 58.** Effectiveness and specificity of Cre-recombinase (Cre) expression in vivo. (A) A 50- $\mu\text{m}$  coronal brain section from a P8  $Nrp1^{M1-/-}$  mouse with Cre and EGFP labeling of M1. Immunostaining for Cre and EGFP showed colocalization in cell bodies, indicating the effectiveness of Cre expression in vivo. (Scale bar, 50  $\mu\text{m}$ .) (B) Coronal sections (12- $\mu\text{m}$ ) from P3  $Nrp1^{M1-/-}$  mice in which CC axons were immunostained with EGFP and Nrp1 in M1. The immunostaining of EGFP showed the Cre and EGFP expression in M1. Most axons with EGFP staining showed low levels of Nrp1 staining (red arrows; positions are the same in all three images). Most axons with Nrp1 staining showed low levels of EGFP staining (yellow arrows). (C) Coronal sections (12- $\mu\text{m}$ ) from P3 floxed  $Nrp1$  mice with EGFP expression only in M1. Data are presented as in B. EGFP-stained axons also showed strong Nrp1 staining. (Scale bar, 5  $\mu\text{m}$  for B and C.)

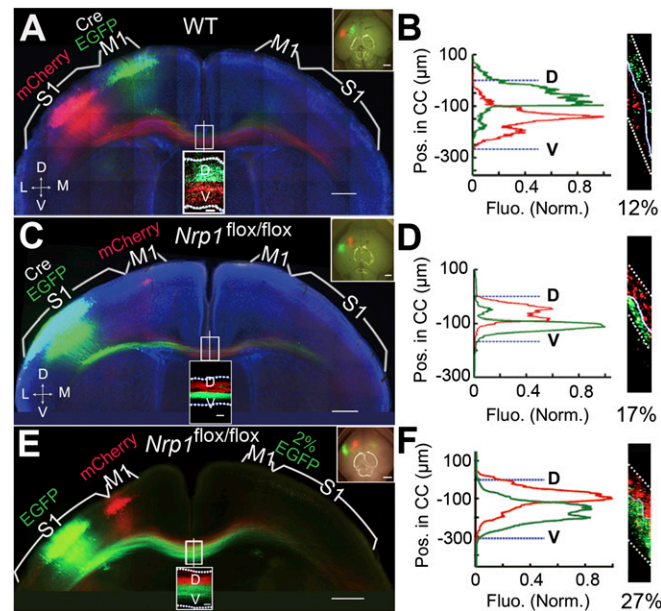

**Fig. 59.** The disruption of axon order was specific for  $Nrp1^{M1-/-}$  mouse brains. (A and B) Coronal sections (200- $\mu\text{m}$ ) from P8  $Nrp1^{WT/WT}$  mice with Cre and EGFP expression in M1 and mCherry expression in S1 presented as in Fig. S4 A and B. The D–V order within the CC was normal. (C and D) A 200- $\mu\text{m}$  coronal section from a P8  $Nrp1^{flox/flox}$  mouse with mCherry expression in M1 and Cre/EGFP in S1. Data are presented as in A and B. No disruption of axonal order was observed in the CC. (E and F) A 200- $\mu\text{m}$  coronal section from a P8  $Nrp1^{M1-/-}$  mouse expressing mCherry in M1 and EGFP in S1 in one hemisphere and the empty vector together with the low-level expression of EGFP (that labeled the cell bodies but not the axons) in the contralateral homotopic M1. Data are presented as in A and B. (Scale bars, 500  $\mu\text{m}$  in A, C, and E.)

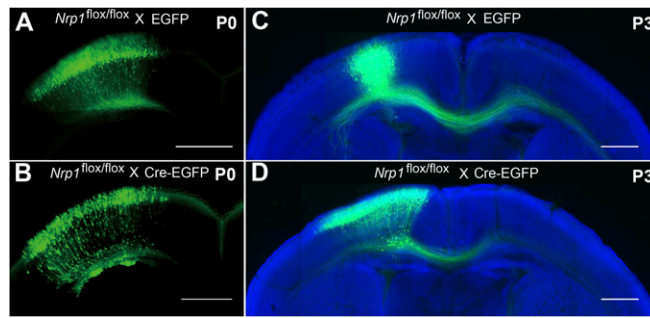

**Fig. S10.** Sema3A/Nrp1 signaling does not affect axon guidance. (A and B) Two coronal sections from P0 *Nrp1*<sup>flox/flox</sup> mice expressing EGFP (A) and Cre/EGFP (B) in the cortex. (A) Substantial axon projections entered CC tract, as in WT mice. (B) Some migration defects were observed in *Nrp1* conditional KO mice, (C and D) Substantial CC axon growth was observed at P3 in both WT (C) and *Nrp1* conditional KO (D) mice. (Scale bars, 500  $\mu$ m.)

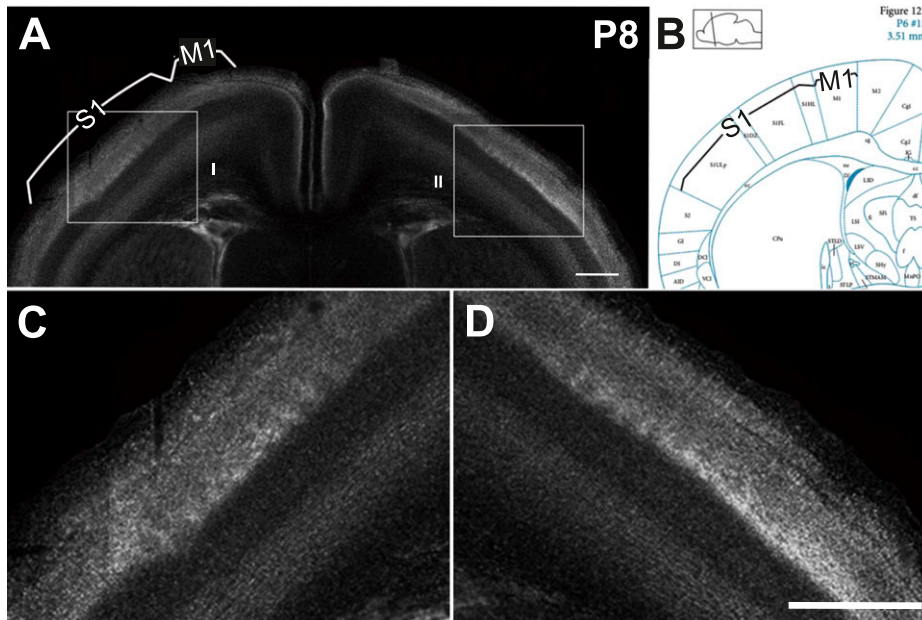

**Fig. S11.** Identification of cortical regions. (A) A coronal brain section of a P8 mouse counterstained with Hoechst. Primary somatosensory cortex (S1) was identified by the presence of barrel structures (anatomically distinguishable barrels which are separated from each other by septa), and primary motor cortex (M1) was identified as a more medial area adjacent to S1. Boxed areas I and II in the S1 are shown in high resolution in C and D, respectively. (B) Sections were compared with a developing mouse brain atlas to verify the position of each area. (C and D) High-resolution images of area shown in box I (C) and box II (D) in A showing obvious barrel structures in S1. (Scale bars, 500  $\mu$ m in A and D. C and D have the same resolution.)

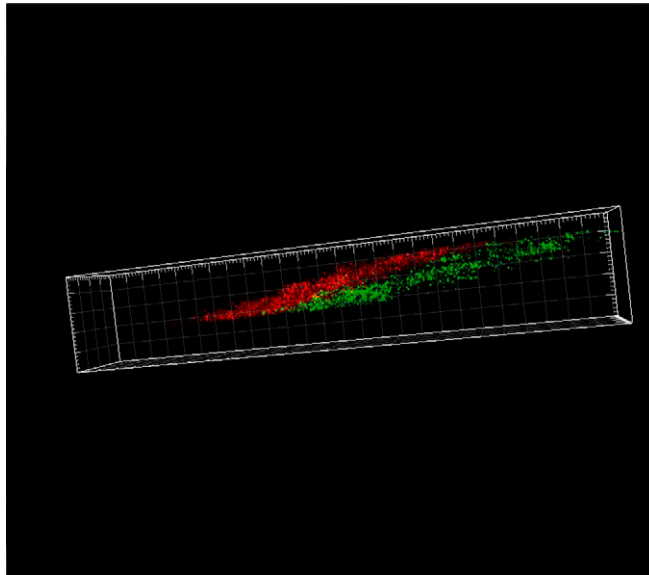

**Movie S1.** This movie demonstrates that labeled M1 (red color) and S1 (green color) axons located in different regions of the CC are segregated from each other. This movie corresponds to position I in Fig. 1 A and B.

[Movie S1](#)

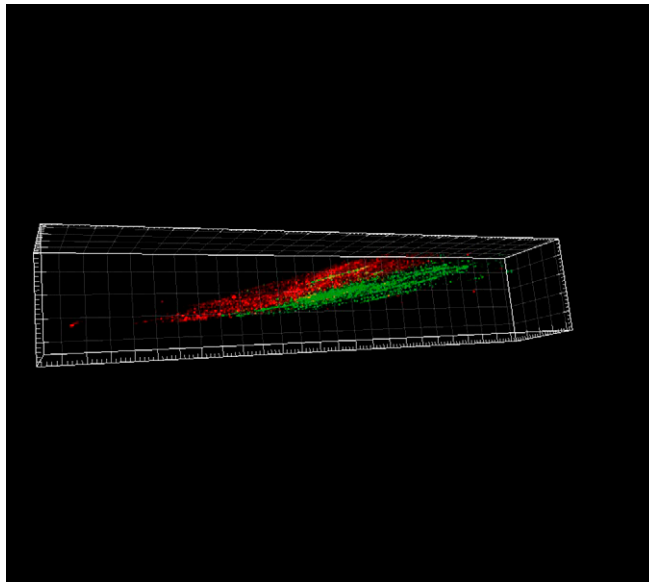

**Movie S2.** This movie demonstrates that labeled M1 (red color) and S1 (green color) axons located in different regions of the CC are segregated from each other. This movie corresponds to position II in Fig. 1 A and B.

[Movie S2](#)

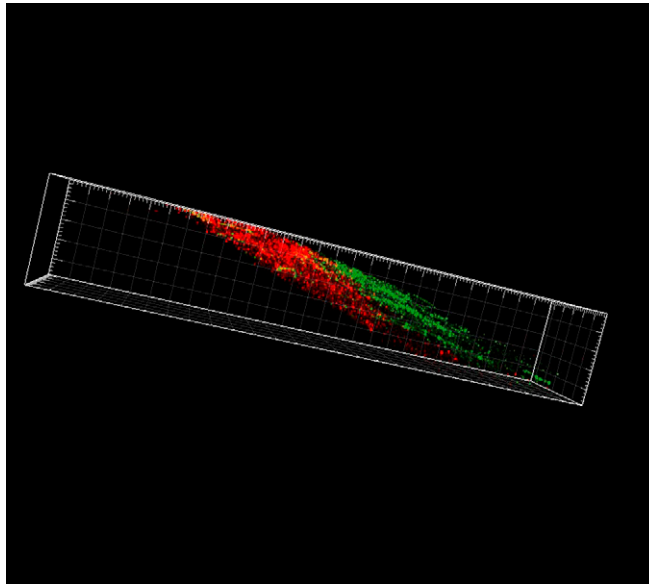

**Movie S3.** This movie demonstrates that labeled M1 (red color) and S1 (green color) axons located in different regions of the CC are segregated from each other. This movie corresponds to position III in Fig. 1 *A* and *B*.

[Movie S3](#)

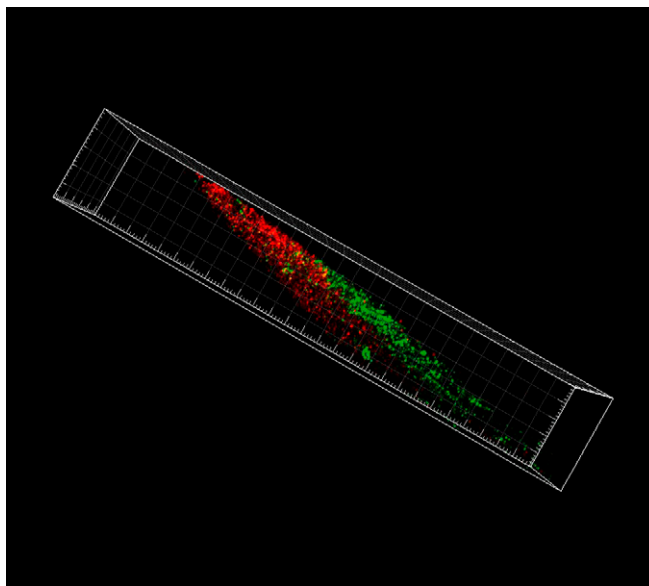

**Movie S4.** This movie demonstrates that labeled M1 (red color) and S1 (green color) axons located in different regions of the CC are segregated from each other. This movie corresponds to position IV in Fig. 1 *A* and *B*.

[Movie S4](#)



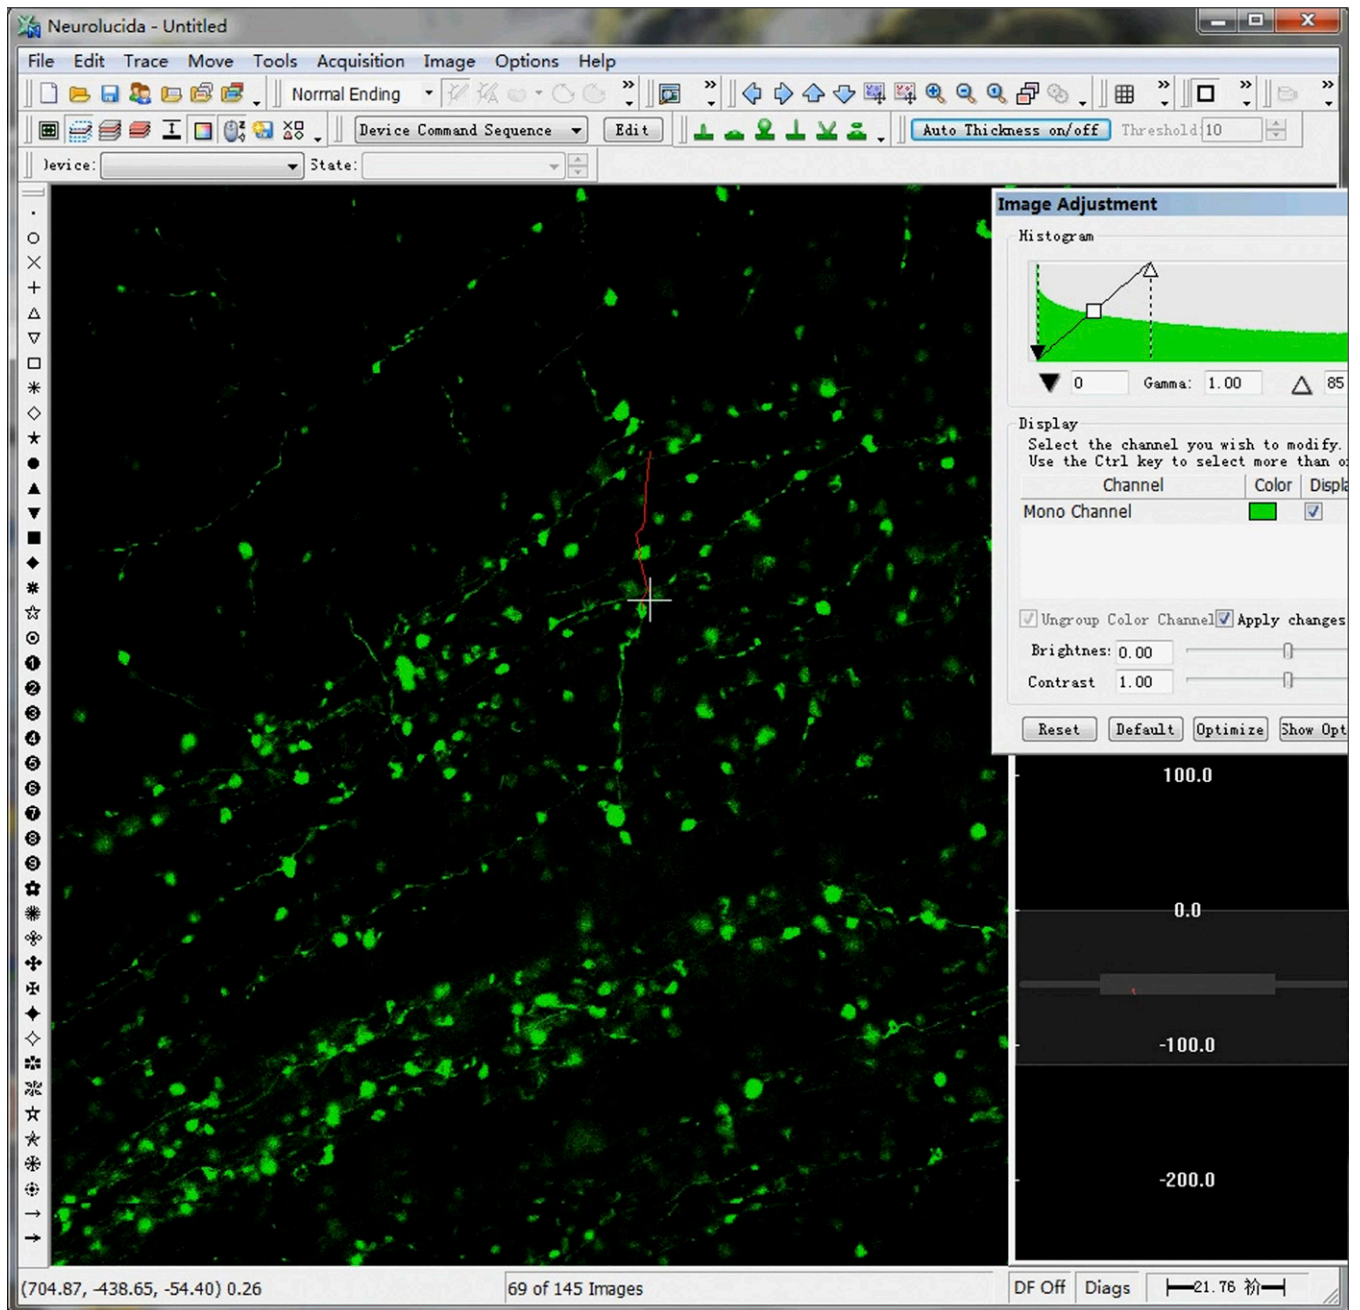

**Movie S5.** This movie demonstrates how single-axon projections within the CC were traced manually using NeuroLucida 9.0 software. The stitched 3D images were loaded into the NeuroLucida 9.0, and only one section was presented at a time. The section change was shown in the window of lower right corner, and the image contrast of each section was adjusted as shown in the window in the upper right corner. The red line demonstrates how a projected axon was traced. We traced axons starting from the hemisphere contralateral to the cell bodies and then tracing back to the midline, representing only part of the entire projection.

[Movie S5](#)
